# Supplementary material for: Epigenetic measures of ageing predict the prevalence and incidence of leading causes of death and disease burden
Source: Clin Epigenetics. 2020 Jul 31;12:115. doi: 10.1186/s13148-020-00905-6 (PMC7394682; doi:10.1186/s13148-020-00905-6)
Supplement: Supplementary file 3 — Additional file 3. Supplementary Tables. The associations between epigenetic measures of ageing and disease phenotypes in the discovery cohort (Bonferroni-corrected threshold: P < 2.54 x 10-4; significant results are emboldened). (Table S1). The associations between epigenetic measures of ageing and continuous phenotypes in the discovery cohort (Bonferroni-corrected threshold: P < 2.54 x 10-4; significant results are emboldened). (Table S2). The associations between epigenetic measures of ageing and all-cause mortality in the discovery cohort (Bonferroni-corrected threshold: P < 2.54 x 10-4; significant results are emboldened). (Table S3). Associations between significant phenotypes (identified in the discovery set) and epigenetic measures of ageing in the replication cohort at P < 6.41 x 10-4. (Table S4). Discovery Cohort: Associations between phenotypes (significant in basic model) and epigenetic measures of ageing in a fully-adjusted model (Bonferroni threshold: P < 6.41 x 10-4). (Table S5). Replication Cohort: Associations between phenotypes (significant in basic model) and epigenetic measures of ageing in a fully-adjusted model (Bonferroni threshold: P < 6.41 x 10-4). (Table S6). Covariate-specific analyses of trait-epigenetic age relationship attenuation in the discovery cohort. (Table S7). Covariate-specific analyses of trait-epigenetic age relationship attenuation in the replication cohort. (Table S8). The associations between epigenetic measures of ageing calculated at study baseline and ICD-10-coded incident disease data in Generation Scotland in a basic model adjusted for age and sex. Significant associations that survived a multiple testing correction threshold of 8.33 x 10-4 (0.05/60 tests) are emboldened. Nominally significant associations are italicised. (Table S9). The associations between epigenetic measures of ageing measured at study baseline and ICD-10-coded incident disease data in Generation Scotland in a fully-adjusted model adjusted for age, [file 13148_2020_905_MOESM3_ESM.xlsx]

## Sheet: Table S1
Table S1. The associations between epigenetic measures of ageing and disease phenotypes in the discovery cohort (Bonferroni-corrected threshold: P<2.54 x 10-4; significant results are emboldened).
	Measure	Variable	n	n events	OR	LCI	UCI	P
	AgeAccelGrim	Alzheimers Disease Maternal	4450	228	0.91	0.78	1.06	0.23
	AgeAccelPheno	Alzheimers Disease Maternal	4450	228	1.04	0.91	1.19	0.56
	DNAmTLAdjAge	Alzheimers Disease Maternal	4450	228	0.91	0.8	1.04	0.17
	Dunedin_PoAm	Alzheimers Disease Maternal	4450	228	0.933233	0.809774	1.07509	0.34
	EEAA	Alzheimers Disease Maternal	4450	228	1.08	0.93	1.24	0.31
	IEAA	Alzheimers Disease Maternal	4450	228	1.03	0.9	1.17	0.7
	AgeAccelGrim	Alzheimers Disease Paternal	4450	134	0.84	0.69	1.02	0.085
	AgeAccelPheno	Alzheimers Disease Paternal	4450	134	1.02	0.86	1.21	0.83
	DNAmTLAdjAge	Alzheimers Disease Paternal	4450	134	1.05	0.88	1.25	0.61
	Dunedin_PoAm	Alzheimers Disease Paternal	4450	134	0.924132	0.771823	1.10628	0.39
	EEAA	Alzheimers Disease Paternal	4450	134	0.96	0.8	1.15	0.65
	IEAA	Alzheimers Disease Paternal	4450	134	1.06	0.9	1.26	0.49
	AgeAccelGrim	Back Pain	1693	480	1.26	1.14	1.41	1.7e-05
	AgeAccelPheno	Back Pain	1693	480	1.17	1.05	1.3	0.0039
	DNAmTLAdjAge	Back Pain	1693	480	0.95	0.85	1.05	0.31
	Dunedin_PoAm	Back Pain	1693	480	1.23368	1.11516	1.36343	4.2e-05
	EEAA	Back Pain	1693	480	1.1	0.98	1.24	0.1
	IEAA	Back Pain	1693	480	1.16	1.04	1.29	0.0068
	AgeAccelGrim	Bowel Cancer	4450	20	0.8	0.47	1.37	0.42
	AgeAccelPheno	Bowel Cancer	4450	20	1	0.66	1.52	0.99
	DNAmTLAdjAge	Bowel Cancer	4450	20	0.94	0.61	1.44	0.77
	Dunedin_PoAm	Bowel Cancer	4450	20	0.994654	0.627507	1.57617	0.98
	EEAA	Bowel Cancer	4450	20	1.35	0.86	2.1	0.19
	IEAA	Bowel Cancer	4450	20	0.88	0.57	1.36	0.58
	AgeAccelGrim	Breast Cancer	4450	63	1.11	0.85	1.45	0.45
	AgeAccelPheno	Breast Cancer	4450	63	1.12	0.88	1.43	0.35
	DNAmTLAdjAge	Breast Cancer	4450	63	0.81	0.63	1.03	0.085
	Dunedin_PoAm	Breast Cancer	4450	63	1.33242	1.04991	1.69215	0.018
	EEAA	Breast Cancer	4450	63	1.16	0.9	1.5	0.26
	IEAA	Breast Cancer	4450	63	1.07	0.85	1.36	0.56
	AgeAccelGrim	Chronic Kidney Disease	4427	85	1.56	1.24	1.94	0.0001
	AgeAccelPheno	Chronic Kidney Disease	4427	85	1.47	1.2	1.79	0.00015
	DNAmTLAdjAge	Chronic Kidney Disease	4427	85	0.77	0.62	0.95	0.013
	Dunedin_PoAm	Chronic Kidney Disease	4427	85	1.4755	1.18175	1.84412	0.00061
	EEAA	Chronic Kidney Disease	4427	85	1.28	1.02	1.6	0.035
	IEAA	Chronic Kidney Disease	4427	85	1.02	0.83	1.26	0.82
	AgeAccelGrim	COPD	4450	48	2.37	1.86	3	1.4e-12
	AgeAccelPheno	COPD	4450	48	1.47	1.14	1.89	0.0026
	DNAmTLAdjAge	COPD	4450	48	0.63	0.48	0.81	0.00045
	Dunedin_PoAm	COPD	4450	48	1.89269	1.48142	2.41814	3.4e-07
	EEAA	COPD	4450	48	1.23	0.92	1.65	0.17
	IEAA	COPD	4450	48	1.28	0.99	1.66	0.059
	AgeAccelGrim	Depression	4450	371	1.62	1.47	1.79	2.5e-22
	AgeAccelPheno	Depression	4450	371	1.24	1.12	1.38	4.8e-05
	DNAmTLAdjAge	Depression	4450	371	0.86	0.77	0.96	0.0069
	Dunedin_PoAm	Depression	4450	371	1.58407	1.43907	1.74194	5.8e-21
	EEAA	Depression	4450	371	1.17	1.04	1.31	0.0068
	IEAA	Depression	4450	371	0.97	0.87	1.08	0.62
	AgeAccelGrim	Diabetes	4450	147	1.58	1.36	1.83	1.4e-09
	AgeAccelPheno	Diabetes	4450	147	1.55	1.33	1.8	2.3e-08
	DNAmTLAdjAge	Diabetes	4450	147	0.75	0.64	0.88	0.00039
	Dunedin_PoAm	Diabetes	4450	147	1.46375	1.2586	1.70233	7.4e-07
	EEAA	Diabetes	4450	147	1.32	1.11	1.57	0.0018
	IEAA	Diabetes	4450	147	1.21	1.04	1.42	0.016
	AgeAccelGrim	Heart Disease	4450	196	1.54	1.34	1.76	5.2e-10
	AgeAccelPheno	Heart Disease	4450	196	1.26	1.1	1.44	0.001
	DNAmTLAdjAge	Heart Disease	4450	196	0.9	0.78	1.04	0.14
	Dunedin_PoAm	Heart Disease	4450	196	1.34986	1.17468	1.55271	2.5e-05
	EEAA	Heart Disease	4450	196	1.02	0.87	1.19	0.78
	IEAA	Heart Disease	4450	196	0.96	0.83	1.1	0.54
	AgeAccelGrim	Lung Cancer	4450	5	0.44	0.11	1.72	0.24
	AgeAccelPheno	Lung Cancer	4450	5	0.51	0.21	1.25	0.14
	DNAmTLAdjAge	Lung Cancer	4450	5	0.92	0.39	2.14	0.85
	Dunedin_PoAm	Lung Cancer	4450	5	0.588017	0.197899	1.75418	0.34
	EEAA	Lung Cancer	4450	5	0.94	0.38	2.31	0.88
	IEAA	Lung Cancer	4450	5	0.45	0.2	1.03	0.06
	AgeAccelGrim	Neck Pain	1693	431	1.19	1.07	1.33	0.002
	AgeAccelPheno	Neck Pain	1693	431	1.15	1.03	1.28	0.012
	DNAmTLAdjAge	Neck Pain	1693	431	0.99	0.89	1.1	0.85
	Dunedin_PoAm	Neck Pain	1693	431	1.20442	1.08502	1.33643	0.00047
	EEAA	Neck Pain	1693	431	1.11	0.98	1.25	0.089
	IEAA	Neck Pain	1693	431	1.17	1.05	1.31	0.0052
	AgeAccelGrim	SCID Depression	4450	825	1.45	1.35	1.57	1.8e-22
	AgeAccelPheno	SCID Depression	4450	825	1.18	1.09	1.27	2.4e-05
	DNAmTLAdjAge	SCID Depression	4450	825	0.88	0.81	0.95	0.0011
	Dunedin_PoAm	SCID Depression	4450	825	1.33643	1.24234	1.43764	6.2e-15
	EEAA	SCID Depression	4450	825	1.09	1.01	1.19	0.033
	IEAA	SCID Depression	4450	825	1.03	0.96	1.12	0.38
	AgeAccelGrim	Stroke	4450	59	1.55	1.23	1.97	0.00027
	AgeAccelPheno	Stroke	4450	59	1.31	1.04	1.65	0.021
	DNAmTLAdjAge	Stroke	4450	59	0.85	0.66	1.09	0.21
	Dunedin_PoAm	Stroke	4450	59	1.53726	1.21288	1.95033	0.00038
	EEAA	Stroke	4450	59	1.13	0.86	1.48	0.38
	IEAA	Stroke	4450	59	0.99	0.77	1.27	0.93

## Sheet: Table S2
Table S2. The associations between epigenetic measures of ageing and continuous phenotypes in the discovery cohort (Bonferroni-corrected threshold: P<2.54 x 10-4; significant results are emboldened).
	Measure	Variable	n	Beta	SE	LCI	UCI	P
	AgeAccelGrim	Average Heart Rate	4444	0.2	0.015	0.1706	0.2294	1.6e-37
	AgeAccelPheno	Average Heart Rate	4444	0.13	0.015	0.1006	0.1594	3.3e-19
	DNAmTLAdjAge	Average Heart Rate	4444	-0.088	0.015	-0.1174	-0.0586	4.4e-09
	Dunedin_PoAm	Average Heart Rate	4444	0.21	0.015	0.1806	0.2394	4e-48
	EEAA	Average Heart Rate	4444	0.11	0.016	0.07864	0.14136	9.2e-13
	IEAA	Average Heart Rate	4444	0.022	0.015	-0.0074	0.0514	0.13
	AgeAccelGrim	Body Mass Index	4423	0.095	0.016	0.06364	0.12636	1.4e-09
	AgeAccelPheno	Body Mass Index	4423	0.16	0.015	0.1306	0.1894	1.4e-26
	DNAmTLAdjAge	Body Mass Index	4423	-0.059	0.015	-0.0884	-0.0296	8.5e-05
	Dunedin_PoAm	Body Mass Index	4423	0.1	0.015	0.0706	0.1294	1.8e-11
	EEAA	Body Mass Index	4423	0.072	0.016	0.04064	0.10336	6.4e-06
	IEAA	Body Mass Index	4423	0.061	0.015	0.0316	0.0904	4.2e-05
	AgeAccelGrim	Creatinine	4427	0.14	0.015	0.1106	0.1694	2.5e-20
	AgeAccelPheno	Creatinine	4427	0.04	0.015	0.0106	0.0694	0.0074
	DNAmTLAdjAge	Creatinine	4427	-0.11	0.015	-0.1394	-0.0806	3.3e-14
	Dunedin_PoAm	Creatinine	4427	-0.033	0.015	-0.0624	-0.0036	0.026
	EEAA	Creatinine	4427	0.24	0.014	0.21256	0.26744	2.8e-62
	IEAA	Creatinine	4427	0.039	0.015	0.0096	0.0684	0.0095
	AgeAccelGrim	Diastolic Pressure	4447	0.005	0.015	-0.0244	0.0344	0.74
	AgeAccelPheno	Diastolic Pressure	4447	0.066	0.014	0.03856	0.09344	4.3e-06
	DNAmTLAdjAge	Diastolic Pressure	4447	-0.014	0.015	-0.0434	0.0154	0.32
	Dunedin_PoAm	Diastolic Pressure	4447	0.012	0.014	-0.01544	0.03944	0.4
	EEAA	Diastolic Pressure	4447	0.036	0.015	0.0066	0.0654	0.018
	IEAA	Diastolic Pressure	4447	0.056	0.014	0.02856	0.08344	9.1e-05
	AgeAccelGrim	Forced Expiratory Flow	3750	-0.16	0.014	-0.18744	-0.13256	1.8e-29
	AgeAccelPheno	Forced Expiratory Flow	3750	-0.055	0.013	-0.08048	-0.02952	4.6e-05
	DNAmTLAdjAge	Forced Expiratory Flow	3750	0.056	0.014	0.02856	0.08344	5e-05
	Dunedin_PoAm	Forced Expiratory Flow	3750	-0.13	0.014	-0.15744	-0.10256	4.3e-21
	EEAA	Forced Expiratory Flow	3750	-0.03	0.015	-0.0594	-0.0006	0.039
	IEAA	Forced Expiratory Flow	3750	0.0042	0.013	-0.02128	0.02968	0.76
	AgeAccelGrim	Forced Expiratory Volume	3776	-0.16	0.011	-0.18156	-0.13844	1.1e-42
	AgeAccelPheno	Forced Expiratory Volume	3776	-0.066	0.011	-0.08756	-0.04444	1.5e-09
	DNAmTLAdjAge	Forced Expiratory Volume	3776	0.052	0.011	0.03044	0.07356	3.9e-06
	Dunedin_PoAm	Forced Expiratory Volume	3776	-0.12	0.011	-0.14156	-0.09844	7.8e-29
	EEAA	Forced Expiratory Volume	3776	-0.025	0.012	-0.04852	-0.00148	0.033
	IEAA	Forced Expiratory Volume	3776	0.00073	0.011	-0.02083	0.02229	0.95
	AgeAccelGrim	Forced Vital Capacity	3775	-0.12	0.012	-0.14352	-0.09648	1.1e-22
	AgeAccelPheno	Forced Vital Capacity	3775	-0.059	0.011	-0.08056	-0.03744	6.4e-08
	DNAmTLAdjAge	Forced Vital Capacity	3775	0.032	0.011	0.01044	0.05356	0.0053
	Dunedin_PoAm	Forced Vital Capacity	3775	-0.087	0.011	-0.10856	-0.06544	5.6e-15
	EEAA	Forced Vital Capacity	3775	-0.019	0.012	-0.04252	0.00452	0.11
	IEAA	Forced Vital Capacity	3775	0.00014	0.011	-0.02142	0.0217	0.99
	AgeAccelGrim	g	4291	-0.22	0.016	-0.25136	-0.18864	6.1e-42
	AgeAccelPheno	g	4291	-0.093	0.015	-0.1224	-0.0636	1.1e-09
	DNAmTLAdjAge	g	4291	0.12	0.015	0.0906	0.1494	3.6e-14
	Dunedin_PoAm	g	4291	-0.19	0.015	-0.2194	-0.1606	2.1e-36
	EEAA	g	4291	-0.065	0.016	-0.09636	-0.03364	6.8e-05
	IEAA	g	4291	0.035	0.015	0.0056	0.0644	0.024
	AgeAccelGrim	gf	4324	-0.19	0.015	-0.2194	-0.1606	5.9e-37
	AgeAccelPheno	gf	4324	-0.079	0.014	-0.10644	-0.05156	3.9e-08
	DNAmTLAdjAge	gf	4324	0.1	0.015	0.0706	0.1294	3.6e-12
	Dunedin_PoAm	gf	4324	-0.17	0.014	-0.19744	-0.14256	8.4e-31
	EEAA	gf	4324	-0.053	0.016	-0.08436	-0.02164	0.00071
	IEAA	gf	4324	0.022	0.014	-0.00544	0.04944	0.14
	AgeAccelGrim	Glucose	4297	0.07	0.015	0.0406	0.0994	6.3e-06
	AgeAccelPheno	Glucose	4297	0.072	0.015	0.0426	0.1014	8.8e-07
	DNAmTLAdjAge	Glucose	4297	-0.023	0.015	-0.0524	0.0064	0.12
	Dunedin_PoAm	Glucose	4297	0.054	0.015	0.0246	0.0834	0.00027
	EEAA	Glucose	4297	0.056	0.016	0.02464	0.08736	0.00039
	IEAA	Glucose	4297	0.024	0.015	-0.0054	0.0534	0.11
	AgeAccelGrim	HDL Cholesterol	4396	-0.14	0.014	-0.16744	-0.11256	1.4e-20
	AgeAccelPheno	HDL Cholesterol	4396	-0.069	0.014	-0.09644	-0.04156	5.3e-07
	DNAmTLAdjAge	HDL Cholesterol	4396	0.033	0.014	0.00556	0.06044	0.02
	Dunedin_PoAm	HDL Cholesterol	4396	-0.14	0.014	-0.16744	-0.11256	2.8e-23
	EEAA	HDL Cholesterol	4396	-0.0021	0.015	-0.0315	0.0273	0.89
	IEAA	HDL Cholesterol	4396	-0.015	0.014	-0.04244	0.01244	0.29
	AgeAccelGrim	Neuroticism	4426	0.084	0.015	0.0546	0.1134	5.7e-08
	AgeAccelPheno	Neuroticism	4426	0.037	0.015	0.0076	0.0664	0.013
	DNAmTLAdjAge	Neuroticism	4426	-0.04	0.015	-0.0694	-0.0106	0.0072
	Dunedin_PoAm	Neuroticism	4426	0.074	0.015	0.0446	0.1034	4.6e-07
	EEAA	Neuroticism	4426	0.029	0.016	-0.00236	0.06036	0.071
	IEAA	Neuroticism	4426	-0.00077	0.015	-0.03017	0.02863	0.96
	AgeAccelPheno	Pack Years	4380	0.15	0.015	0.1206	0.1794	2.4e-24
	DNAmTLAdjAge	Pack Years	4380	-0.17	0.015	-0.1994	-0.1406	3e-28
	Dunedin_PoAm	Pack Years	4380	0.46	0.013	0.43452	0.48548	5e-234
	EEAA	Pack Years	4380	0.025	0.016	-0.00636	0.05636	0.12
	IEAA	Pack Years	4380	0.04	0.015	0.0106	0.0694	0.0071
	AgeAccelGrim	QT Interval (corrected for heart rate)	4374	0.0011	0.015	-0.0283	0.0305	0.94
	AgeAccelPheno	QT Interval (corrected for heart rate)	4374	0.055	0.014	0.02756	0.08244	8.4e-05
	DNAmTLAdjAge	QT Interval (corrected for heart rate)	4374	0.0085	0.014	-0.01894	0.03594	0.55
	Dunedin_PoAm	QT Interval (corrected for heart rate)	4374	-0.0049	0.014	-0.03234	0.02254	0.73
	EEAA	QT Interval (corrected for heart rate)	4374	0.027	0.015	-0.0024	0.0564	0.077
	IEAA	QT Interval (corrected for heart rate)	4374	0.048	0.014	0.02056	0.07544	0.00071
	AgeAccelGrim	SIMD	4236	-0.28	0.015	-0.3094	-0.2506	3.3e-72
	AgeAccelPheno	SIMD	4236	-0.11	0.015	-0.1394	-0.0806	7.7e-14
	DNAmTLAdjAge	SIMD	4236	0.13	0.015	0.1006	0.1594	5.5e-17
	Dunedin_PoAm	SIMD	4236	-0.24	0.015	-0.2694	-0.2106	8.7e-57
	EEAA	SIMD	4236	-0.078	0.016	-0.10936	-0.04664	1.6e-06
	IEAA	SIMD	4236	0.012	0.015	-0.0174	0.0414	0.43
	AgeAccelGrim	Systolic Pressure	4447	0.0097	0.014	-0.01774	0.03714	0.49
	AgeAccelPheno	Systolic Pressure	4447	0.033	0.013	0.00752	0.05848	0.013
	DNAmTLAdjAge	Systolic Pressure	4447	-0.004	0.014	-0.03144	0.02344	0.77
	Dunedin_PoAm	Systolic Pressure	4447	0.0094	0.013	-0.01608	0.03488	0.48
	EEAA	Systolic Pressure	4447	0.0084	0.014	-0.01904	0.03584	0.56
	IEAA	Systolic Pressure	4447	0.015	0.013	-0.01048	0.04048	0.25
	AgeAccelGrim	Total Cholesterol	4409	-0.032	0.015	-0.0614	-0.0026	0.037
	AgeAccelPheno	Total Cholesterol	4409	-0.029	0.015	-0.0584	0.0004	0.045
	DNAmTLAdjAge	Total Cholesterol	4409	0.014	0.015	-0.0154	0.0434	0.35
	Dunedin_PoAm	Total Cholesterol	4409	-0.033	0.015	-0.0624	-0.0036	0.025
	EEAA	Total Cholesterol	4409	-0.038	0.016	-0.06936	-0.00664	0.015
	IEAA	Total Cholesterol	4409	0.0054	0.015	-0.024	0.0348	0.71
	AgeAccelGrim	Waist:Hip Ratio	4383	0.15	0.013	0.12452	0.17548	6.5e-33
	AgeAccelPheno	Waist:Hip Ratio	4383	0.11	0.012	0.08648	0.13352	1.3e-20
	DNAmTLAdjAge	Waist:Hip Ratio	4383	-0.056	0.012	-0.07952	-0.03248	6.9e-06
	Dunedin_PoAm	Waist:Hip Ratio	4383	0.13	0.012	0.10648	0.15352	2.4e-25
	EEAA	Waist:Hip Ratio	4383	0.031	0.013	0.00552	0.05648	0.016
	IEAA	Waist:Hip Ratio	4383	0.036	0.012	0.01248	0.05952	0.0028

## Sheet: Table S3
Table S3. The associations between epigenetic measures of ageing and all-cause mortality in the discovery cohort (Bonferroni-corrected threshold: P<2.54 x 10-4; significant results are emboldened).
	Measure	n	n events	HR	LCI	UCI	P
	AgeAccelGrim	4450	182	1.87	1.64	2.13	<2.0E-16
	Dunedin_PoAm	4450	182	1.7	1.49	1.94	5.4e-15
	AgeAccelPheno	4450	182	1.47	1.29	1.67	2.9e-09
	DNAmTLAdjAge	4450	182	0.7	0.61	0.79	6.4e-08
	EEAA	4450	182	1.39	1.2	1.61	1.1e-05
	IEAA	4450	182	1.12	0.98	1.28	0.1

## Sheet: Table S4
Table S4. Associations between significant phenotypes (identified in the discovery set) and epigenetic measures of ageing in the replication cohort at P<6.41 x 10-4.
	Categorical Phenotypes
	Measure	Variable	n	n events	OR	LCI	UCI	P
	AgeAccelGrim	COPD	2531	32	3.49034	2.51431	4.90375	1.4e-13
	Dunedin_PoAm	COPD	2531	32	3.42123	2.38214	4.95303	3.6e-11
	AgeAccelGrim	Heart Disease	2531	95	1.71258	1.40495	2.08757	1e-07
	AgeAccelGrim	Back Pain	1467	295	1.33776	1.18057	1.5174	5.4e-06
	AgeAccelGrim	Depression	2531	414	1.2586	1.13315	1.39654	1.7e-05
	AgeAccelGrim	SCID Depression	2578	984	1.18412	1.0897	1.2866	6.6e-05
	AgeAccelPheno	Diabetes	2531	89	1.48142	1.21774	1.80399	8.7e-05
	AgeAccelGrim	Diabetes	2531	89	1.47108	1.21046	1.78783	0.00011
	Dunedin_PoAm	Back Pain	1467	293	1.28917	1.1275	1.47403	0.00019
	Dunedin_PoAm	Heart Disease	2531	95	1.39236	1.12412	1.72461	0.0025
	AgeAccelPheno	Depression	2531	414	1.16649	1.05064	1.29563	0.004
	Dunedin_PoAm	SCID Depression	2578	984	1.11293	1.02634	1.20563	0.0095
	AgeAccelPheno	Chronic Kidney Disease	2563	40	1.44051	1.0781	1.92707	0.014
	AgeAccelPheno	SCID Depression	2578	984	1.0956	1.01096	1.18768	0.026
	Dunedin_PoAm	Diabetes	2531	89	1.26364	1.02388	1.55893	0.029
	AgeAccelGrim	Chronic Kidney Disease	2563	40	1.25609	0.887808	1.77713	0.2
	Dunedin_PoAm	Depression	2531	414	1.05622	0.950374	1.17351	0.31
	Continuous Phenotypes
	Measure	Variable	n	Beta	SE	LCI	UCI	P
	Dunedin_PoAm	Pack Years	2522	0.38	0.018	0.34472	0.41528	4.1e-91
	AgeAccelGrim	SIMD	2457	-0.27	0.02	-0.3092	-0.2308	1.7e-38
	Dunedin_PoAm	SIMD	2457	-0.24	0.02	-0.2792	-0.2008	9.1e-34
	AgeAccelGrim	Forced Expiratory Volume	2191	-0.15	0.015	-0.1794	-0.1206	5.7e-24
	DNAmTLAdjAge	Pack Years	2522	-0.2	0.02	-0.2392	-0.1608	2.5e-23
	AgeAccelGrim	Forced Expiratory Flow	2185	-0.18	0.02	-0.21528	-0.14472	2.6e-23
	AgeAccelGrim	Average Heart Rate	2572	0.18	0.02	0.1408	0.2192	1.1e-19
	AgeAccelPheno	Pack Years	2522	0.17	0.019	0.13276	0.20724	1.4e-17
	AgeAccelGrim	Waist:Hip Ratio	2535	0.15	0.018	0.11472	0.18528	1.1e-16
	Dunedin_PoAm	Forced Expiratory Flow	2185	-0.13	0.017	-0.16332	-0.09668	8.3e-14
	AgeAccelPheno	Average Heart Rate	2572	0.14	0.019	0.10276	0.17724	1.6e-13
	DNAmTLAdjAge	SIMD	2457	0.15	0.021	0.10884	0.19116	4.6e-13
	EEAA	Creatinine	2563	0.14	0.019	0.10276	0.17724	5e-13
	AgeAccelGrim	gf	2529	-0.14	0.019	-0.17724	-0.10276	1.5e-12
	Dunedin_PoAm	Forced Expiratory Volume	2191	-0.1	0.014	-0.12744	-0.07256	1.9e-12
	AgeAccelGrim	g	2504	-0.14	0.021	-0.18116	-0.09884	1.2e-11
	Dunedin_PoAm	g	2504	-0.13	0.02	-0.1692	-0.0908	1.5e-11
	Dunedin_PoAm	Average Heart Rate	2572	0.13	0.019	0.09276	0.16724	2.1e-11
	AgeAccelPheno	SIMD	2457	-0.12	0.02	-0.1592	-0.0808	1e-09
	Dunedin_PoAm	gf	2529	-0.11	0.019	-0.14724	-0.07276	6.1e-09
	AgeAccelPheno	Waist:Hip Ratio	2535	0.096	0.017	0.06268	0.12932	1.6e-08
	AgeAccelGrim	HDL Cholesterol	2543	-0.11	0.019	-0.14724	-0.07276	1.9e-08
	DNAmTLAdjAge	Creatinine	2563	-0.11	0.019	-0.14724	-0.07276	2e-08
	AgeAccelPheno	Body Mass Index	2567	0.11	0.019	0.07276	0.14724	2.7e-08
	AgeAccelGrim	Neuroticism	2565	0.11	0.02	0.0708	0.1492	4.8e-08
	AgeAccelGrim	Forced Vital Capacity	2191	-0.082	0.015	-0.1114	-0.0526	6.5e-08
	AgeAccelPheno	Diastolic Pressure	2573	0.097	0.019	0.05976	0.13424	2.4e-07
	Dunedin_PoAm	HDL Cholesterol	2543	-0.095	0.018	-0.13028	-0.05972	2.4e-07
	DNAmTLAdjAge	Forced Expiratory Volume	2191	0.065	0.014	0.03756	0.09244	5.4e-06
	DNAmTLAdjAge	Waist:Hip Ratio	2535	-0.079	0.018	-0.11428	-0.04372	7.6e-06
	IEAA	Body Mass Index	2567	0.085	0.019	0.04776	0.12224	1.2e-05
	DNAmTLAdjAge	Forced Expiratory Flow	2185	0.077	0.018	0.04172	0.11228	1.4e-05
	AgeAccelPheno	Forced Expiratory Flow	2185	-0.074	0.017	-0.10732	-0.04068	1.7e-05
	AgeAccelPheno	Forced Expiratory Volume	2191	-0.057	0.014	-0.08444	-0.02956	4.3e-05
	AgeAccelGrim	Creatinine	2563	0.079	0.019	0.04176	0.11624	4.6e-05
	Dunedin_PoAm	Neuroticism	2565	0.077	0.019	0.03976	0.11424	7.8e-05
	EEAA	Average Heart Rate	2572	0.078	0.02	0.0388	0.1172	0.00011
	DNAmTLAdjAge	Average Heart Rate	2572	-0.076	0.02	-0.1152	-0.0368	0.00017
	Dunedin_PoAm	Forced Vital Capacity	2191	-0.053	0.015	-0.0824	-0.0236	0.00027
	Dunedin_PoAm	Body Mass Index	2567	0.068	0.02	0.0288	0.1072	0.00055
	DNAmTLAdjAge	gf	2529	0.065	0.019	0.02776	0.10224	0.00084
	DNAmTLAdjAge	g	2504	0.068	0.02	0.0288	0.1072	0.00094
	EEAA	SIMD	2457	-0.067	0.021	-0.10816	-0.02584	0.0012
	AgeAccelPheno	Glucose	2508	0.058	0.019	0.02076	0.09524	0.0025
	AgeAccelPheno	HDL Cholesterol	2543	-0.052	0.018	-0.08728	-0.01672	0.0051
	AgeAccelGrim	Body Mass Index	2567	0.055	0.02	0.0158	0.0942	0.0064
	AgeAccelGrim	Glucose	2508	0.051	0.02	0.0118	0.0902	0.01
	AgeAccelPheno	Forced Vital Capacity	2191	-0.031	0.014	-0.05844	-0.00356	0.031
	IEAA	Diastolic Pressure	2573	0.041	0.019	0.00376	0.07824	0.031
	AgeAccelPheno	g	2504	-0.041	0.02	-0.0802	-0.0018	0.038
	EEAA	Glucose	2508	0.04	0.02	0.0008	0.0792	0.039
	AgeAccelPheno	gf	2529	-0.038	0.019	-0.07524	-0.00076	0.045
	EEAA	Body Mass Index	2567	0.031	0.02	-0.0082	0.0702	0.12
	EEAA	g	2504	-0.026	0.02	-0.0652	0.0132	0.2
	DNAmTLAdjAge	Body Mass Index	2567	-0.024	0.02	-0.0632	0.0152	0.24
	AgeAccelPheno	QT Interval (corrected for heart rate)	2542	0.0078	0.019	-0.02944	0.04504	0.68
	Mortality Analysis
	Measure	Variable	n	n events	HR	LCI	UCI	P
	AgeAccelGrim	All-Cause Mortality	2578	57	1.7	1.35	2.14	6.5e-06
	Dunedin_PoAm	All-Cause Mortality	2578	57	1.69	1.3	2.18	8.1e-05
	EEAA	All-Cause Mortality	2578	57	1.39	1.12	1.72	0.003
	AgeAccelPheno	All-Cause Mortality	2578	57	1.38	1.11	1.73	0.005
	DNAmTLAdjAge	All-Cause Mortality	2578	57	0.808	0.628	1.04	0.099

## Sheet: Table S5
Table S5. Discovery Cohort: Associations between phenotypes (significant in basic model) and epigenetic measures of ageing in a fully-adjusted model (Bonferroni threshold: P<6.41 x 10-4).
	Categorical Phenotypes
	Measure	Variable	n	n events	OR	LCI	UCI	P
	AgeAccelGrim	COPD	2419	48	2	1.30083	3.00417	0.00014
	AgeAccelGrim	Diabetes	2419	147	1.49182	1.14339	1.94838	0.0032
	AgeAccelPheno	Diabetes	2419	147	1.28531	1.04477	1.58249	0.02
	AgeAccelGrim	Depression	2419	371	1.23491	1.00015	1.52501	0.05
	Dunedin_PoAm	COPD	2419	48	1.38819	0.914114	2.10855	0.12
	AgeAccelGrim	Heart Disease	2419	196	1.21653	0.941576	1.57302	0.13
	AgeAccelGrim	SCID Depression	2419	825	1.05464	0.911285	1.22018	0.48
	AgeAccelGrim	Back Pain	863	480	1.05327	0.854704	1.29693	0.63
	Dunedin_PoAm	Back Pain	863	480	1.01308	0.843665	1.21653	0.89
	Continuous Phenotypes
	Measure	Variable	n	Beta	SE	LCI	UCI	P
	Dunedin_PoAm	Pack Years	2419	0.45	0.019	0.41276	0.48724	1.2e-112
	EEAA	Creatinine	2406	0.21	0.019	0.17276	0.24724	1.4e-26
	Dunedin_PoAm	Average Heart Rate	2416	0.19	0.023	0.14492	0.23508	1.6e-15
	AgeAccelGrim	Creatinine	2406	0.19	0.024	0.14296	0.23704	3e-15
	AgeAccelGrim	Average Heart Rate	2416	0.19	0.027	0.13708	0.24292	1.4e-12
	DNAmTLAdjAge	Pack Years	2419	-0.14	0.02	-0.1792	-0.1008	1.1e-11
	AgeAccelPheno	Body Mass Index	2419	0.12	0.019	0.08276	0.15724	2.5e-10
	Dunedin_PoAm	SIMD	2419	-0.13	0.022	-0.17312	-0.08688	1.8e-09
	AgeAccelPheno	Pack Years	2419	0.11	0.02	0.0708	0.1492	3e-08
	AgeAccelGrim	SIMD	2419	-0.13	0.024	-0.17704	-0.08296	5.9e-08
	EEAA	Average Heart Rate	2416	0.11	0.022	0.06688	0.15312	2.1e-07
	AgeAccelPheno	Average Heart Rate	2416	0.1	0.02	0.0608	0.1392	5.7e-07
	AgeAccelGrim	Forced Expiratory Flow	2055	-0.12	0.024	-0.16704	-0.07296	1.2e-06
	DNAmTLAdjAge	Average Heart Rate	2416	-0.091	0.021	-0.13216	-0.04984	1.1e-05
	AgeAccelGrim	Forced Expiratory Volume	2074	-0.083	0.019	-0.12024	-0.04576	2e-05
	Dunedin_PoAm	HDL Cholesterol	2390	-0.082	0.02	-0.1212	-0.0428	6.4e-05
	AgeAccelGrim	Waist:Hip Ratio	2391	0.071	0.019	0.03376	0.10824	0.00022
	AgeAccelGrim	HDL Cholesterol	2390	-0.081	0.023	-0.12608	-0.03592	0.00054
	DNAmTLAdjAge	Creatinine	2406	-0.068	0.02	-0.1072	-0.0288	0.00062
	IEAA	Body Mass Index	2419	0.064	0.019	0.02676	0.10124	0.00083
	Dunedin_PoAm	Forced Expiratory Flow	2055	-0.068	0.021	-0.10916	-0.02684	0.0013
	AgeAccelGrim	g	2346	-0.075	0.025	-0.124	-0.026	0.0025
	Dunedin_PoAm	g	2346	-0.065	0.021	-0.10616	-0.02384	0.0025
	AgeAccelGrim	gf	2363	-0.069	0.025	-0.118	-0.02	0.0049
	AgeAccelPheno	SIMD	2419	-0.052	0.019	-0.08924	-0.01476	0.0062
	Dunedin_PoAm	gf	2363	-0.059	0.021	-0.10016	-0.01784	0.0062
	DNAmTLAdjAge	Forced Expiratory Flow	2055	0.041	0.018	0.00572	0.07628	0.028
	DNAmTLAdjAge	SIMD	2419	0.042	0.019	0.00476	0.07924	0.028
	Dunedin_PoAm	Forced Expiratory Volume	2074	-0.037	0.017	-0.07032	-0.00368	0.031
	AgeAccelPheno	Forced Expiratory Flow	2055	-0.037	0.018	-0.07228	-0.00172	0.039
	AgeAccelPheno	Waist:Hip Ratio	2391	0.028	0.014	0.00056	0.05544	0.053
	AgeAccelGrim	Forced Vital Capacity	2073	-0.035	0.02	-0.0742	0.0042	0.076
	Dunedin_PoAm	Body Mass Index	2419	0.039	0.023	-0.00608	0.08408	0.085
	AgeAccelGrim	Neuroticism	2411	-0.043	0.026	-0.09396	0.00796	0.1
	DNAmTLAdjAge	Forced Expiratory Volume	2074	0.02	0.015	-0.0094	0.0494	0.18
	DNAmTLAdjAge	Waist:Hip Ratio	2391	-0.019	0.015	-0.0484	0.0104	0.2
	AgeAccelPheno	Forced Expiratory Volume	2074	-0.014	0.014	-0.04144	0.01344	0.33
	Dunedin_PoAm	Neuroticism	2411	-0.0053	0.023	-0.05038	0.03978	0.82
	AgeAccelPheno	Diastolic Pressure	2418	0.0025	0.018	-0.03278	0.03778	0.89
	Dunedin_PoAm	Forced Vital Capacity	2073	-0.0006	0.017	-0.03392	0.03272	0.97
	Mortality Analysis
	Measure	Variable	n	n events	HR	LCI	UCI	P
	AgeAccelGrim	All-Cause Mortality	2419	89	1.62	1.26	2.07	0.00014
	Dunedin_PoAm	All-Cause Mortality	2419	89	1.48	1.18	1.86	0.00069

## Sheet: Table S6
Table S6. Replication Cohort: Associations between phenotypes (significant in basic model) and epigenetic measures of ageing in a fully-adjusted model (Bonferroni threshold: P<6.41 x 10-4).
	Categorical Phenotypes
	Measure	Variable	n	n events	OR	LCI	UCI	P
	AgeAccelGrim	Heart Disease	1340	95	2.08757	1.47108	2.97427	3.7e-05
	AgeAccelGrim	COPD	1340	32	3.28708	1.72633	6.29654	0.0003
	Dunedin_PoAm	COPD	1340	32	3.03436	1.51135	6.04965	0.0018
	AgeAccelGrim	SCID Depression	1340	984	1.17351	1.00961	1.36479	0.037
	AgeAccelGrim	Diabetes	1340	89	1.33509	0.910829	1.95815	0.14
	Dunedin_PoAm	Back Pain	809	293	1.15604	0.936037	1.42761	0.18
	AgeAccelPheno	Diabetes	1340	89	1.2214	0.880734	1.69554	0.23
	AgeAccelGrim	Back Pain	809	293	1.13202	0.90303	1.41907	0.28
	AgeAccelGrim	Depression	1340	414	1.09406	0.894939	1.33776	0.38
	Continuous Phenotypes
	Measure	Variable	n	Beta	SE	LCI	UCI	P
	Dunedin_PoAm	Pack Years	1340	0.33	0.026	0.27904	0.38096	7.6e-36
	DNAmTLAdjAge	Pack Years	1340	-0.18	0.026	-0.23096	-0.12904	2.7e-11
	AgeAccelPheno	Pack Years	1340	0.16	0.026	0.10904	0.21096	9.5e-10
	AgeAccelGrim	SIMD	1340	-0.19	0.033	-0.25468	-0.12532	4.6e-09
	AgeAccelGrim	Average Heart Rate	1339	0.2	0.035	0.1314	0.2686	1.6e-08
	Dunedin_PoAm	SIMD	1340	-0.16	0.029	-0.21684	-0.10316	2.2e-08
	EEAA	Creatinine	1334	0.13	0.026	0.07904	0.18096	4.2e-07
	AgeAccelGrim	Forced Expiratory Flow	1149	-0.15	0.031	-0.21076	-0.08924	1.4e-06
	AgeAccelPheno	Body Mass Index	1340	0.12	0.026	0.06904	0.17096	7.4e-06
	AgeAccelPheno	Average Heart Rate	1339	0.12	0.027	0.06708	0.17292	7.7e-06
	DNAmTLAdjAge	SIMD	1340	0.11	0.027	0.05708	0.16292	4.5e-05
	AgeAccelGrim	Forced Expiratory Volume	1151	-0.098	0.026	-0.14896	-0.04704	0.00014
	AgeAccelGrim	Creatinine	1334	0.13	0.034	0.06336	0.19664	0.0002
	Dunedin_PoAm	Average Heart Rate	1339	0.11	0.03	0.0512	0.1688	0.00022
	Dunedin_PoAm	Forced Expiratory Flow	1149	-0.091	0.026	-0.14196	-0.04004	0.00047
	AgeAccelPheno	Diastolic Pressure	1340	0.086	0.025	0.037	0.135	0.00074
	IEAA	Body Mass Index	1340	0.087	0.026	0.03604	0.13796	0.00075
	AgeAccelGrim	HDL Cholesterol	1321	-0.11	0.032	-0.17272	-0.04728	0.00097
	Dunedin_PoAm	HDL Cholesterol	1321	-0.087	0.027	-0.13992	-0.03408	0.0014
	DNAmTLAdjAge	Creatinine	1334	-0.087	0.027	-0.13992	-0.03408	0.0015
	AgeAccelPheno	SIMD	1340	-0.08	0.026	-0.13096	-0.02904	0.0026
	EEAA	Average Heart Rate	1339	0.079	0.028	0.02412	0.13388	0.0043
	AgeAccelGrim	Waist:Hip Ratio	1327	0.059	0.023	0.01392	0.10408	0.012
	AgeAccelPheno	Forced Expiratory Flow	1149	-0.054	0.023	-0.09908	-0.00892	0.021
	Dunedin_PoAm	Forced Expiratory Volume	1151	-0.049	0.022	-0.09212	-0.00588	0.023
	DNAmTLAdjAge	Average Heart Rate	1339	-0.053	0.029	-0.10984	0.00384	0.066
	DNAmTLAdjAge	Forced Expiratory Flow	1149	0.042	0.024	-0.00504	0.08904	0.079
	Dunedin_PoAm	Body Mass Index	1340	0.049	0.029	-0.00784	0.10584	0.097
	AgeAccelPheno	Waist:Hip Ratio	1327	0.028	0.018	-0.00728	0.06328	0.12
	AgeAccelPheno	Forced Expiratory Volume	1151	-0.029	0.019	-0.06624	0.00824	0.13
	AgeAccelGrim	gf	1320	-0.049	0.032	-0.11172	0.01372	0.13
	Dunedin_PoAm	g	1311	-0.028	0.028	-0.08288	0.02688	0.3
	DNAmTLAdjAge	Forced Expiratory Volume	1151	0.018	0.02	-0.0212	0.0572	0.36
	Dunedin_PoAm	gf	1320	-0.025	0.027	-0.07792	0.02792	0.36
	Dunedin_PoAm	Neuroticism	1336	-0.023	0.03	-0.0818	0.0358	0.43
	AgeAccelGrim	g	1311	-0.023	0.032	-0.08572	0.03972	0.47
	DNAmTLAdjAge	Waist Hip Ratio	1327	-0.012	0.019	-0.04924	0.02524	0.54
	AgeAccelGrim	Forced Vital Capacity	1151	-0.013	0.026	-0.06396	0.03796	0.63
	Dunedin_PoAm	Forced Vital Capacity	1151	-0.0047	0.022	-0.04782	0.03842	0.83
	AgeAccelGrim	Neuroticism	1336	0.00056	0.035	-0.06804	0.06916	0.99
	Mortality Analysis
	Measure	Variable	n	n events	HR	LCI	UCI	P
	AgeAccelGrim	All-Cause Mortality	1340	30	2.1	1.36	3.25	0.00056
	Dunedin_PoAm	All-Cause Mortality	1340	30	1.44	0.953	2.18	0.084

## Sheet: Table S7
Table S7. Covariate-specific analyses of trait-epigenetic age relationship attenuation in the discovery cohort.
	Basic Model			Alcohol		Body Mass Index		Educational Attainment		Pack Years		SIMD
	Measure	Variable	Effect Size	Effect Size	% Attenuation	Effect Size	% Attenuation	Effect Size	% Attenuation	Effect Size	% Attenuation	Effect Size	% Attenuation
	AgeAccelGrim	All_Cause Mortality	1.87	1.78	0.0481	1.86	0.0053	1.89	-0.0107	1.8	0.0374	1.86	0.0053
	AgeAccelGrim	Back Pain	0.234	0.162	0.3077	0.212	0.094	0.214	0.0855	0.246	-0.05	0.197	0.1581
	AgeAccelGrim	COPD	0.861	0.979	-0.137	0.865	-0.0046	0.865	-0.0046	0.603	0.3	0.807	0.0627
	AgeAccelGrim	Depression	0.482	0.312	0.3527	0.476	0.0124	0.471	0.0228	0.41	0.15	0.43	0.1079
	AgeAccelGrim	Diabetes	0.456	0.496	-0.0877	0.442	0.0307	0.438	0.0395	0.432	0.05	0.411	0.0987
	AgeAccelGrim	Heart Disease	0.431	0.454	-0.0534	0.43	0.0023	0.38	0.1183	0.376	0.13	0.316	0.2668
	AgeAccelGrim	SCID Depression	0.374	0.215	0.4251	0.372	0.0053	0.384	-0.0267	0.261	0.3	0.325	0.131
	AgeAccelGrim	Average Heart Rate	0.2	0.21	-0.05	0.18	0.1	0.19	0.05	0.19	0.05	0.18	0.1
	AgeAccelGrim	Creatinine	0.14	0.12	0.1429	0.13	0.0714	0.14	0	0.19	-0.3571	0.16	-0.1429
	AgeAccelGrim	Forced Expiratory Flow	-0.16	-0.17	-0.0625	-0.17	-0.0625	-0.16	0	-0.13	0.1875	-0.15	0.0625
	AgeAccelGrim	Forced Expiratory Volume	-0.16	-0.15	0.0625	-0.15	0.0625	-0.14	0.125	-0.13	0.1875	-0.14	0.125
	AgeAccelGrim	Forced Vital Capacity	-0.12	-0.1	0.1667	-0.11	0.0833	-0.099	0.175	-0.097	0.1917	-0.09	0.25
	AgeAccelGrim	g	-0.22	-0.19	0.1364	-0.21	0.0455	-0.12	0.4545	-0.2	0.0909	-0.16	0.2727
	AgeAccelGrim	gf	-0.19	-0.16	0.1579	-0.18	0.0526	-0.12	0.3684	-0.18	0.0526	-0.14	0.2632
	AgeAccelGrim	HDL Cholesterol	-0.14	-0.15	-0.0714	-0.11	0.2143	-0.12	0.1429	-0.12	0.1429	-0.11	0.2143
	AgeAccelGrim	Neuroticism	0.084	0.014	0.8333	0.082	0.0238	0.064	0.2381	0.054	0.3571	0.059	0.2976
	AgeAccelGrim	SIMD	-0.28	-0.24	0.1429	-0.23	0.1786	-0.24	0.1429	-0.25	0.1071	NA	NA
	AgeAccelGrim	Waist:Hip Ratio	0.15	0.14	0.0667	0.11	0.2667	0.13	0.1333	0.13	0.1333	0.14	0.0667
	AgeAccelPheno	Diabetes	0.436	0.402	0.078	0.327	0.25	0.419	0.039	0.383	0.12	0.429	0.0161
	AgeAccelPheno	Average Heart Rate	0.13	0.13	0	0.11	0.1538	0.13	0	0.12	0.0769	0.12	0.0769
	AgeAccelPheno	Body Mass Index	0.16	0.14	0.125	NA	NA	0.15	0.0625	0.15	0.0625	0.15	0.0625
	AgeAccelPheno	Diastolic Pressure	0.066	0.047	0.2879	0.023	0.6515	0.062	0.0606	0.063	0.0455	0.071	-0.0758
	AgeAccelPheno	Forced Expiratory Flow	-0.055	-0.059	-0.0727	-0.062	-0.1273	-0.049	0.1091	-0.037	0.3273	-0.046	0.1636
	AgeAccelPheno	Forced Expiratory Volume	-0.066	-0.052	0.2121	-0.058	0.1212	-0.056	0.1515	-0.049	0.2576	-0.053	0.197
	AgeAccelPheno	Pack Years	0.15	0.14	0.0667	0.15	0	0.14	0.0667	NA	NA	0.15	0
	AgeAccelPheno	SIMD	-0.11	-0.095	0.1364	-0.092	0.1636	-0.089	0.1909	-0.086	0.2182	NA	NA
	AgeAccelPheno	Waist:Hip Ratio	0.11	0.1	0.0909	0.053	0.5182	0.1	0.0909	0.099	0.1	0.097	0.1182
	DNAmTLAdjAge	Average Heart Rate	-0.088	-0.1	-0.1364	-0.079	0.1023	-0.088	0	-0.07	0.2045	-0.078	0.1136
	DNAmTLAdjAge	Creatinine	-0.11	-0.063	0.4273	-0.1	0.0909	-0.11	0	-0.12	-0.0909	-0.12	-0.0909
	DNAmTLAdjAge	Forced Expiratory Flow	0.056	0.069	-0.2321	0.058	-0.0357	0.053	0.0536	0.036	0.3571	0.047	0.1607
	DNAmTLAdjAge	Forced Expiratory Volume	0.052	0.051	0.0192	0.048	0.0769	0.045	0.1346	0.034	0.3462	0.036	0.3077
	DNAmTLAdjAge	Pack Years	-0.17	-0.16	0.0588	-0.16	0.0588	-0.15	0.1176	NA	NA	-0.17	0
	DNAmTLAdjAge	SIMD	0.13	0.1	0.2308	0.11	0.1538	0.1	0.2308	0.095	0.2692	NA	NA
	DNAmTLAdjAge	Waist:Hip Ratio	-0.056	-0.048	0.1429	-0.032	0.4286	-0.043	0.2321	-0.041	0.2679	-0.041	0.2679
	Dunedin_PoAm	Back Pain	0.207	0.1985	0.0410628	0.1885	0.089372	0.1865	0.0990338	0.2	0.0338164	0.1777	0.141546
	Dunedin_PoAm	COPD	0.6365	0.630239	0.00983582	0.632124	0.00687478	0.623449	0.0205048	0.295645	0.535515	0.577224	0.093128
	Dunedin_PoAm	Pack Years	0.46	0.445412	0.0317128	0.46141	-0.00306565	0.45437	0.01224	NA	NA	0.439166	0.0452907
	Dunedin_PoAm	Average Heart Rate	0.214184	0.213485	0.00326495	0.201225	0.0605064	0.208102	0.0283938	0.205959	0.0384002	0.201547	0.0590007
	Dunedin_PoAm	SIMD	-0.238854	-0.203365	0.148579	-0.228459	0.0435195	-0.204956	0.141919	-0.188344	0.211465	NA	NA
	Dunedin_PoAm	HDL Cholesterol	-0.137293	-0.132287	0.0364653	-0.110251	0.196969	-0.127266	0.0730377	-0.122213	0.10984	-0.109394	0.203209
	Dunedin_PoAm	Forced Expiratory Flow	-0.128387	-0.121989	0.0498342	-0.132939	-0.0354627	-0.124255	0.0321846	-0.0894841	0.30301	-0.160129	-0.247239
	Dunedin_PoAm	g	-0.19099	-0.159171	0.166599	-0.17983	0.0584321	-0.112888	0.408936	-0.163909	0.141796	-0.147747	0.226415
	Dunedin_PoAm	gf	-0.165927	-0.133872	0.193189	-0.15633	0.0578382	-0.107279	0.353456	-0.139	0.162284	-0.15224	0.0824894
	Dunedin_PoAm	Forced Expiratory Volume	-0.122603	-0.104445	0.148099	-0.117115	0.0447616	-0.110904	0.0954211	-0.0876408	0.285164	-0.145912	-0.190122
	Dunedin_PoAm	Body Mass Index	0.0999788	0.0823955	0.17587	NA	NA	0.079424	0.205592	0.0999093	0.000694847	0.0893186	0.106625
	Dunedin_PoAm	Neuroticism	0.0741424	0.0269864	0.636019	0.0708886	0.0438853	0.0570857	0.230052	0.0497227	0.329361	0.0444184	0.400904
	Dunedin_PoAm	Forced Vital Capacity	-0.0870566	-0.0642221	0.262295	-0.077165	0.113623	-0.0747841	0.140972	-0.0610613	0.298602	-0.0993818	-0.141576
	Dunedin_PoAm	All_Cause Mortality	1.87	1.57	0.160428	1.68	0.101604	1.69	0.0962567	1.58	0.15508	1.69	0.0962567
	EEAA	Average Heart Rate	0.11	0.13	-0.1818	0.1	0.0909	0.12	-0.0909	0.11	0	0.11	0
	EEAA	Creatinine	0.24	0.2	0.1667	0.24	0	0.25	-0.0417	0.25	-0.0417	0.25	-0.0417
	IEAA	Body Mass Index	0.061	0.064	-0.0492	NA	NA	0.065	-0.0656	0.057	0.0656	0.057	0.0656
	Mean Attenuation				0.114013		0.0970408		0.104586		0.15108		0.094936

## Sheet: Table S8
Table S8. Covariate-specific analyses of trait-epigenetic age relationship attenuation in the replication cohort.
	Basic Model			Alcohol		Body Mass Index		Educational Attainment		Pack Years		SIMD
	Measure	Variable	Effect Size	Effect Size	% Attenuation	Effect Size	% Attenuation	Effect Size	% Attenuation	Effect Size	% Attenuation	Effect Size	% Attenuation
	AgeAccelGrim	All-Cause Mortality	1.7	1.67	0.0176	1.67	0.0176	1.7	0	1.71	-0.0059	1.66	0.0235
	AgeAccelGrim	Back Pain	0.291	0.276	0.0515	0.276	0.0515	0.273	0.0619	0.177	0.3918	0.248	0.1478
	AgeAccelGrim	COPD	1.25	1.25	0	1.25	0	1.22	0.024	1.03	0.176	1.23	0.016
	AgeAccelGrim	Depression	0.23	0.23	0	0.23	0	0.245	-0.0652	0.18	0.2174	0.198	0.1391
	AgeAccelGrim	Diabetes	0.386	0.395	-0.0233	0.395	-0.0233	0.327	0.1528	0.32	0.171	0.275	0.2876
	AgeAccelGrim	Heart Disease	0.538	0.52	0.0335	0.52	0.0335	0.543	-0.0093	0.523	0.0279	0.529	0.0167
	AgeAccelGrim	SCID Depression	0.169	0.171	-0.0118	0.171	-0.0118	0.193	-0.142	0.153	0.0947	0.152	0.1006
	AgeAccelGrim	Average Heart Rate	0.2	0.17	0.15	0.14	0.3	0.18	0.1	0.17	0.15	0.17	0.15
	AgeAccelGrim	Creatinine	0.14	0.078	0.442857	0.078	0.442857	0.081	0.421429	0.13	0.0714286	0.096	0.314286
	AgeAccelGrim	Forced Expiratory Flow	-0.16	-0.18	-0.125	-0.18	-0.125	-0.18	-0.125	-0.12	0.25	-0.18	-0.125
	AgeAccelGrim	Forced Expiratory Volume	-0.16	-0.15	0.0625	-0.12	0.25	-0.14	0.125	-0.11	0.3125	-0.14	0.125
	AgeAccelGrim	Forced Vital Capacity	-0.12	-0.076	0.366667	-0.076	0.366667	-0.074	0.383333	-0.057	0.525	-0.064	0.466667
	AgeAccelGrim	g	-0.22	-0.14	0.363636	-0.12	0.354545	-0.066	0.7	-0.11	0.5	-0.074	0.663636
	AgeAccelGrim	gf	-0.19	-0.13	0.315789	-0.13	0.315789	-0.085	0.552632	-0.12	0.368421	-0.081	0.573684
	AgeAccelGrim	HDL Cholesterol	-0.14	-0.094	0.328571	-0.1	0.285714	-0.11	0.214286	-0.09	0.357143	-0.081	0.421429
	AgeAccelGrim	Neuroticism	0.08	0.05	0.375	0.13	-0.625	0.1	-0.25	0.08	0	0.073	0.0875
	AgeAccelGrim	SIMD	-0.28	-0.26	0.0714286	-0.26	0.0714286	-0.22	0.214286	-0.21	0.214286	NA	NA
	AgeAccelGrim	Waist:Hip Ratio	0.15	0.13	0.133333	0.13	0.133333	0.14	0.0666667	0.1	0.333333	0.13	0.133333
	AgeAccelPheno	Diabetes	0.393	0.32	0.1858	0.32	0.1858	0.389	0.0102	0.344	0.1247	0.367	0.0662
	AgeAccelPheno	Average Heart Rate	0.13	0.13	0	0.14	-0.0769231	0.14	-0.0769231	0.13	0	0.14	-0.0769231
	AgeAccelPheno	Body Mass Index	0.16	0.11	0.3125	NA	NA	0.1	0.375	0.095	0.40625	0.097	0.39375
	AgeAccelPheno	Diastolic Pressure	0.06	0.065	-0.0833333	0.02	0.623	0.091	-0.516667	0.099	-0.65	0.094	-0.566667
	AgeAccelPheno	Forced Expiratory Flow	-0.06	-0.081	-0.35	-0.09	-0.5	-0.076	-0.266667	-0.053	0.116667	-0.074	-0.233333
	AgeAccelPheno	Forced Expiratory Volume	-0.07	-0.051	0.271429	-0.06	0.142857	-0.053	0.242857	-0.04	0.428571	-0.05	0.285714
	AgeAccelPheno	Pack Years	0.15	0.15	0	0.15	0	0.16	-0.0666667	NA	NA	0.15	0
	AgeAccelPheno	SIMD	-0.11	-0.11	0	-0.11	0	-0.12	-0.0909091	-0.094	0.145455	NA	NA
	AgeAccelPheno	Waist:Hip Ratio	0.11	0.058	0.472727	0.09	0.131818	0.094	0.145455	0.077	0.3	0.089	0.190909
	DNAmTLAdjAge	Average Heart Rate	-0.09	-0.071	0.211111	-0.08	0.111111	-0.071	0.211111	-0.055	0.388889	-0.062	0.311111
	DNAmTLAdjAge	Creatinine	-0.11	-0.11	0	-0.12	-0.0909091	-0.11	0	-0.12	-0.0909091	-0.11	0
	DNAmTLAdjAge	Forced Expiratory Flow	0.06	0.078	-0.3	0.078	-0.3	0.073	-0.216667	0.047	0.216667	0.07	-0.166667
	DNAmTLAdjAge	Forced Expiratory Volume	0.05	0.063	-0.26	-0.07	2.1	0.056	-0.12	0.041	0.18	0.054	-0.08
	DNAmTLAdjAge	Pack Years	-0.17	-0.19	-0.117647	-0.17	0	-0.19	-0.117647	NA	NA	-0.18	-0.0588235
	DNAmTLAdjAge	SIMD	0.13	0.15	-0.153846	0.16	-0.230769	0.13	0	0.12	0.0769231	NA	NA
	DNAmTLAdjAge	Waist:Hip Ratio	-0.06	-0.07	-0.166667	-0.06	0	-0.073	-0.216667	-0.05	0.166667	-0.062	-0.0333333
	Dunedin_PoAm	Back Pain	0.25	0.2987	-0.1948	0.2411	0.0356	0.2247	0.1012	0.1665	0.334	0.1889	0.2444
	Dunedin_PoAm	COPD	1.23	1.1683	0.0501626	1.2357	-0.00463415	1.2111	0.0153659	0.9196	0.252358	1.174	0.0455285
	Dunedin_PoAm	Pack Years	0.37972	0.36128	0.0485629	0.369903	0.0258526	0.368259	0.0301823	NA	NA	0.376099	0.00953553
	Dunedin_PoAm	Average Heart Rate	0.130649	0.152372	-0.166274	0.121189	0.0724058	0.119731	0.0835611	0.103772	0.205721	0.105261	0.19432
	Dunedin_PoAm	SIMD	-0.240472	-0.222359	0.0753232	-0.232851	0.0316925	-0.202111	0.159522	-0.194022	0.193162	NA	NA
	Dunedin_PoAm	HDL Cholesterol	-0.0953502	-0.123492	-0.295139	-0.0764036	0.198705	-0.0955832	-0.00244383	-0.0760935	0.201957	-0.0676169	0.290857
	Dunedin_PoAm	Forced Expiratory Flow	-0.130576	-0.134174	-0.0275511	-0.134395	-0.0292492	-0.12989	0.00525066	-0.0780202	0.402492	-0.173319	-0.327345
	Dunedin_PoAm	g	-0.134429	-0.124732	0.0721362	-0.130473	0.0294309	-0.0732334	0.455227	-0.114664	0.147035	-0.0848028	0.369165
	Dunedin_PoAm	gf	-0.10905	-0.102647	0.0587177	-0.105535	0.0322289	-0.0651844	0.402251	-0.0892664	0.181416	-0.0917257	0.158863
	Dunedin_PoAm	Forced Expiratory Volume	-0.0997054	-0.113564	-0.138994	-0.0939679	0.0575449	-0.086528	0.132164	-0.0613279	0.384909	-0.128162	-0.285404
	Dunedin_PoAm	Body Mass Index	0.0676004	0.0943225	-0.395296	NA	NA	0.0538127	0.203958	0.0410744	0.392394	0.0512099	0.242461
	Dunedin_PoAm	Neuroticism	0.0769939	0.0336457	0.563008	0.0734288	0.0463031	0.0620436	0.194175	0.0532471	0.308424	0.0336651	0.562756
	Dunedin_PoAm	Forced Vital Capacity	-0.0532845	-0.0694899	-0.304129	-0.0437977	0.17804	-0.0398646	0.251854	-0.030648	0.424824	-0.0673362	-0.26371
	Dunedin_PoAm	All_Cause Mortality	1.69	1.47	0.130178	1.64	0.0295858	1.72	-0.0177515	1.61	0.0473373	1.65	0.0236686
	EEAA	Average Heart Rate	0.11	0.073	0.336364	0.073	0.336364	0.068	0.381818	0.073	0.336364	0.077	0.3
	EEAA	Creatinine	0.24	0.14	0.416667	0.14	0.416667	0.14	0.416667	0.15	0.375	0.14	0.416667
	IEAA	Body Mass Index	0.06	0.087	-0.416667	NA	NA	0.085	-0.416667	0.085	-0.416667	0.084	-0.4
	Mean Attenuation				0.0467966		0.112299		0.080725		0.202825		0.109692

## Sheet: Table S9
Table S9. The associations between epigenetic measures of ageing calculated at study baseline and ICD-10-coded incident disease data in Generation Scotland in a basic model adjusted for age and sex. Significant associations that survived a multiple testing correction threshold of 8.33 x 10-4 (0.05/60 tests) are emboldened. Nominally significant associations are italicised.
				DNAm GrimAge				DunedinPoAm				DNAm PhenoAge				HannumAge				HorvathAge				DNAm Telomere Length
	Trait	no. of cases	no. of controls	Hazard Ratio	LCI	UCI	P	Hazard Ratio	LCI	UCI	P	Hazard Ratio	LCI	UCI	P	Hazard Ratio	LCI	UCI	P	Hazard Ratio	LCI	UCI	P	Hazard Ratio	LCI	UCI	P
	Alzheimer's Disease (participants over 60)	20	1936	1.70003	1.06477	2.7143	0.0262266	1.66698	1.05412	2.63615	0.028862	1.48842	0.994394	2.22787	0.0532801	1.08614	0.75622	1.55999	0.654651	1.27817	0.917638	1.78036	0.146613	1.01448	0.661757	1.5552	0.947429
	Chronic Obstructive Pulmonary Disease	193	9236	2.65297	2.3567	2.98649	1.16162e-58	2.61636	2.2705	3.01489	2.45729e-40	1.57669	1.37446	1.80868	7.96534e-11	1.24951	1.09264	1.42891	0.00113638	1.12824	0.980702	1.29796	0.0915208	0.637408	0.554213	0.733093	2.77342e-10
	Depression	67	8424	1.41761	1.07667	1.8665	0.0129086	1.42105	1.06133	1.90268	0.0182895	1.37255	1.02462	1.83864	0.0337543	1.17471	0.862389	1.60015	0.307195	0.845971	0.618496	1.15711	0.295204	0.711504	0.529841	0.955452	0.0236397
	Ischemic Heart Disease	408	8756	1.46428	1.3236	1.61991	1.36054e-13	1.3068	1.16821	1.46183	2.89573e-06	1.29346	1.16693	1.43371	9.62937e-07	1.05624	0.946233	1.17904	0.329521	1.07871	0.971392	1.19789	0.156449	0.80795	0.727004	0.897907	7.51661e-05
	Stroke	186	9211	1.42596	1.23289	1.64926	1.7495e-06	1.51949	1.3041	1.77045	8.12254e-08	1.18046	1.02328	1.3618	0.0228704	0.986713	0.848463	1.14749	0.862122	1.00966	0.874055	1.16631	0.89604	0.753874	0.652486	0.871016	0.00012613
	Type 2 Diabetes	149	9070	1.74537	1.51589	2.00958	9.6207e-15	1.63603	1.39767	1.91505	8.9474e-10	1.73327	1.50036	2.00234	8.00609e-14	1.10542	0.940504	1.29924	0.224049	1.18245	1.016	1.37616	0.0303863	0.763273	0.651827	0.893775	0.000795132
	Back and Neck Pain (Dorsalgia)	184	7838	1.2212	1.00588	1.48261	0.0434626	1.04416	0.852899	1.27831	0.675505	1.04546	0.854767	1.2787	0.665231	1.01365	0.821794	1.25029	0.899249	0.90721	0.739171	1.11345	0.351465	0.967462	0.787188	1.18902	0.753211
	Breast Cancer	83	9307	1.19382	0.932988	1.52758	0.158983	1.2985	1.01313	1.66425	0.03911	1.35693	1.07297	1.71602	0.0108368	1.24258	0.983538	1.56984	0.0686359	1.00813	0.789409	1.28746	0.948248	0.806181	0.631836	1.02863	0.0831161
	Bowel Cancer	63	9417	1.15356	0.896149	1.48491	0.267494	1.22109	0.948593	1.57186	0.121061	1.24541	0.977719	1.58638	0.0754913	1.23688	0.975122	1.5689	0.0797207	1.04885	0.820855	1.34016	0.702929	0.817392	0.638954	1.04566	0.108571
	Lung Cancer	223	9277	1.53048	1.34701	1.73893	6.47536e-11	1.47203	1.28284	1.68912	3.61558e-08	1.12596	0.980415	1.29311	0.0929789	0.900864	0.780662	1.03957	0.153058	1.01662	0.886925	1.16529	0.812845	1.00487	0.870922	1.15943	0.946905

## Sheet: Table S10
Table S10. The associations between epigenetic measures of ageing measured at study baseline and ICD-10-coded incident disease data in Generation Scotland in a fully-adjusted model adjusted for age, sex and common disease risk factors. Significant associations that survived a multiple testing correction threshold of 8.33 x 10-4 (0.05/60 tests) are emboldened. Nominally significant associations ar…
	Measure	Variable	no. of cases	no. of controls	Hazard Ratio	LCI	UCI	P
	DNAm GrimAge	Chronic Obstructive Pulmonary Disease	193	9236	2.21687	1.80663	2.72026	2.4409e-14
	DunedinPoAm	Chronic Obstructive Pulmonary Disease	193	9236	2.02086	1.59069	2.56736	8.3738e-09
	DNAm GrimAge	Ischemic Heart Disease	408	8756	1.41064	1.18482	1.67951	0.000110972
	DNAm Telomere Length	Ischemic Heart Disease	408	8756	0.8	0.69	0.92	0.00025
	DNAm GrimAge	Type 2 Diabetes	149	9070	1.52103	1.2	1.9	0.000313971
	DNAm PhenoAge	Type 2 Diabetes	149	9070	1.5442	1.21125	1.96867	0.000453607
	DunedinPoAm	Lung Cancer	223	9277	1.4514	1.17555	1.79198	0.000532644
	DNAm GrimAge	Lung Cancer	223	9277	1.42595	1.14927	1.76923	0.00126358
	DunedinPoAm	Stroke	186	9211	1.48124	1.15501	1.89961	0.00196567
	DNAm Telomere Length	Stroke	186	9211	0.759479	0.614186	0.939143	0.0111001
	DNAm PhenoAge	Chronic Obstructive Pulmonary Disease	193	9236	1.32217	1.06443	1.64231	0.0115916
	DNAm GrimAge	Stroke	186	9211	1.37027	1.06061	1.77034	0.015944
	DNAm Telomere Length	Chronic Obstructive Pulmonary Disease	193	9236	0.763884	0.607357	0.960752	0.0213238
	DNAm PhenoAge	Ischemic Heart Disease	408	8756	1.19335	1.0258	1.38826	0.0220225
	DNAm Telomere Length	Type 2 Diabetes	149	9070	0.764059	0.59037	0.988849	0.0408367
	DunedinPoAm	Ischemic Heart Disease	408	8756	1.06177	0.890408	1.26612	0.504484
	DunedinPoAm	Type 2 Diabetes	149	9070	0.990356	0.750857	1.30625	0.945301

[truncated: 1 more sheets: Table S11]
